# Supplementary material
Source: ML conference proceedings conference paper supplement (https://openaccess.thecvf.com/content/WACV2025/html/Athwale_DarSwin-Unet_Distortion_Aware_WACV_2025_paper.html)
Supplement: Supplementary file 1 [file Athwale_DarSwin-Unet_Distortion_Aware_WACV_2025_supplemental.pdf]

# DarSwin-Unet: Distortion Aware Architecture-Supplementary Material

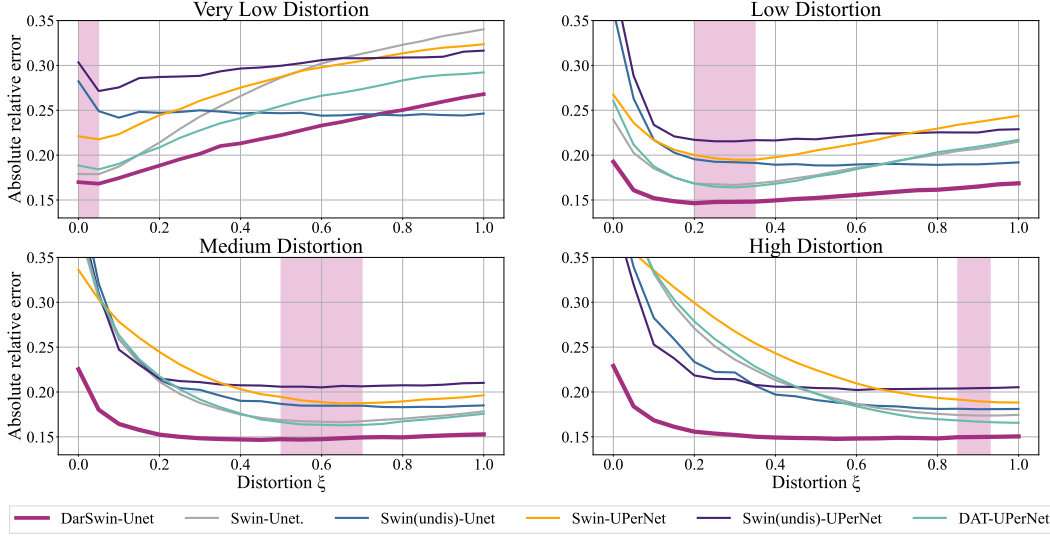

Figure 1. Absolute relative error (lower better) in depth estimation as a function of test distortion for the six baselines: DarSwin-Unet, Swin-Unet [2], Swin(undis)-Unet, Swin-UPerNet [3, 6], Swin(undis)-UPerNet and DAT-UPerNet [5, 6]. All methods are trained on a restricted set of lens distortion curves (indicated by the pink shaded regions): (a) very low, (b) low, (c) medium, and (d) high distortion. We study the generalization abilities of each model by testing across all  $\xi \in [0, 1]$ . The squared relative error follows the same curves as the absolute relative error.

## A. Depth estimation

### A.1. Evaluation metrics

These detailed explanation of the evaluation metrics as shown in main text are defined as follows:

- Absolute relative error =  $\frac{1}{|D|} \sum_{d \in D} \frac{|d^* - d|}{d^*}$
- RMSE =  $\sqrt{\frac{1}{|D|} \sum_{d \in D} ||d^* - d||^2}$
- Square relative error =  $\frac{1}{|D|} \sum_{d \in D} \frac{||d^* - d||^2}{d^{*2}}$
- log-RMSE =  $\sqrt{\frac{1}{|D|} \sum_{d \in D} ||\log d^* - \log d||^2}$
- $\delta_t = \frac{1}{|D|} |\{d \in D | \max(\frac{d^*}{d}, \frac{d}{d^*}) \leq 1.25^t\}|$ ,  $t \in \{1, 2, 3\}$

with  $D$ ,  $d^*$  and  $d$  are respectively the set of valid depths, the ground truth depth and the predicted depth. We show the results for each metric similar to Fig. 9 in the main text.

### A.2. Proposed sampling function

The goal is to identify a class of functions that is parameterized by a minimal number of parameters while still being capable of representing a wide variety of monotonic profiles between two interpolation points,  $(0, 0)$  and  $(a, b)$ . The initial approach involves using a power-law function, which is widely employed in engineering due to its simplicity and its ability to model relationships between unknown quantities with minimal parametrization.

$$p_n(\theta) = b \left( \frac{\theta}{a} \right)^n,$$

The function  $p(0) = 0$  and  $p(a) = \text{FOV}$ . This formulation generates convex curves ( $n \geq 1$ ) or concave curves ( $n < 1$ ), with a derivative of zero or a non-existent derivative (tangent to the y-axis) at the origin. The underlying idea is that if a curve exhibits cuspidal behavior at one end, it should also be capable of exhibiting such behavior at the other end. To achieve this symmetry, two reflections are

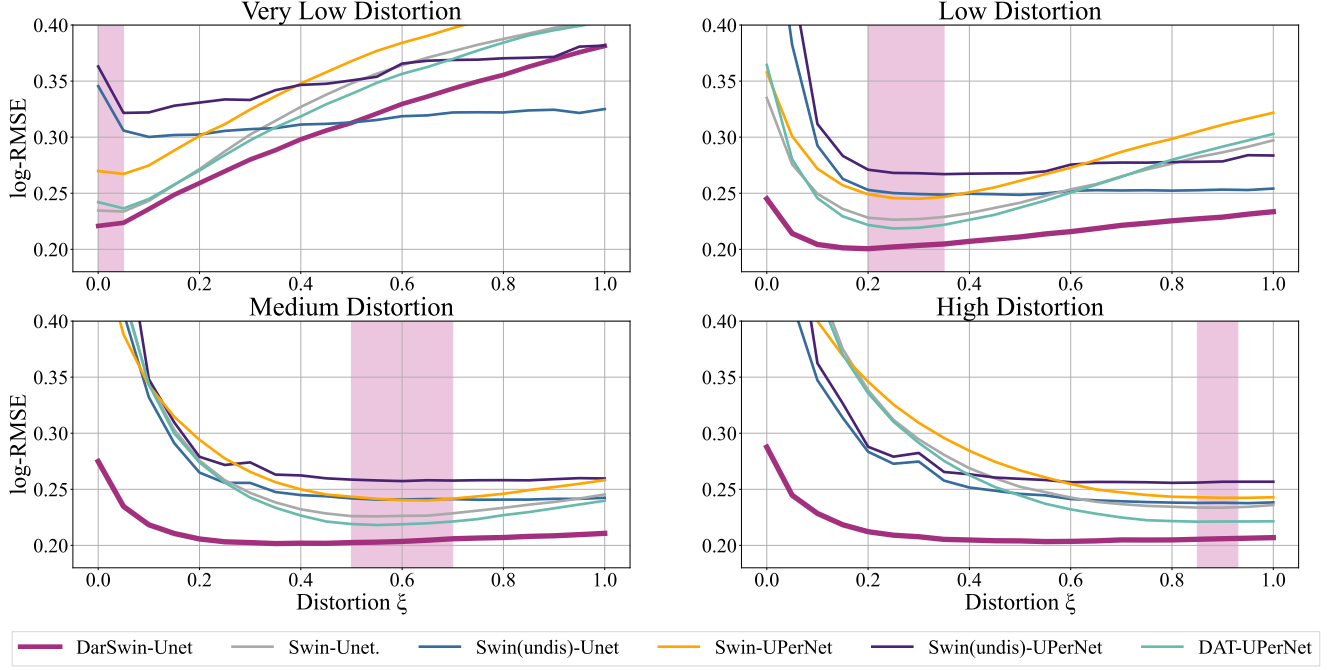

Figure 2. log-RMSE (lower better) in depth estimation as a function of test distortion for the six baselines: DarSwin-Unet, Swin-Unet [2], Swin(undis)-Unet, Swin-UPerNet [3, 6], Swin(undis)-UPerNet and DAT-UPerNet [5, 6]. All methods are trained on a restricted set of lens distortion curves (indicated by the pink shaded regions): (a) Very low, (b) low, (c) medium and (d) high distortion. We study the generalization abilities of each model by testing across all  $\xi \in [0, 1]$ . RMSE follows the same curves as log-RMSE.

applied to flip the function vertically and horizontally.

$$q_m(\theta) = 1 - \left(1 - \frac{\theta}{a}\right)^m,$$

which also satisfy the interpolation conditions. This approach can generate both convex ( $m \geq 1$ ) and concave ( $m < 1$ ) curves. To combine these curves while ensuring the interpolation conditions remain satisfied, their convex combination is utilized.

$$g(\theta) = \lambda p_n(\theta) + (1 - \lambda)q_m(\theta), \quad (1)$$

for  $\lambda \in [0, 1]$ . If  $m < 1$ ,  $n > 1$  or  $m > 1$ ,  $n < 1$ , the resulting curve is clearly monotonic increasing. In cases where both  $m$  and  $n$  are either greater than 1 or less than 1, the curve remains monotonic. This family of curves is parameterized by the three parameters  $m, n, t$ .

### A.3. Derivative of uniform camera model projection

The Unified camera model [1, 4] as explained in the main text, bounded parameter  $\xi \in [0, 1]$ <sup>1</sup> projects the world point to the image as follows

$$r_d = \mathcal{P}(\theta) = \frac{f \cos \theta}{\xi + \sin \theta}, \quad (2)$$

<sup>1</sup> $\xi$  can be slightly greater than 1 for certain types of catadioptric cameras [7] but this is ignored here.

where  $r_d$  is the radial distance from the image center,  $\theta$  the incident angle lens,  $f$  the focal length and  $\xi$  the distortion parameter.

For a fixed  $\theta$  (field of view), to prove that the extremities of the derivatives with respect to  $g(\theta)$  for this projection function lie at  $\xi = 0$  and  $\xi = 1$ , we first need to calculate  $\frac{dr_d}{dg(\theta)}$ . To do so, let us first compute  $\frac{dr_d}{d\theta}$ ,

$$\frac{dr_d}{d\theta} = \frac{d}{d\theta} \left( \frac{f \cos \theta}{\xi + \sin \theta} \right), \quad (3)$$

$$\frac{dr_d}{d\theta} = \frac{\frac{d}{d\theta}(f \cos(\theta))(\xi + \sin(\theta)) - (f \cos(\theta)) \frac{d}{d\theta}(\xi + \sin(\theta))}{(\xi + \sin(\theta))^2}, \quad (4)$$

$$\frac{dr_d}{d\theta} = \frac{-f(\xi \sin \theta + 1)}{(\xi + \sin(\theta))^2}. \quad (5)$$

To calculate  $\frac{dr_d}{dg(\theta)}$ , we can write  $\theta = g^{-1}(g(\theta))$  and use chain rule :

$$\frac{d\theta}{dg(\theta)} = \frac{1}{g'(\theta)}, \quad (6)$$

$$\frac{dr_d}{dg(\theta)} = \frac{dr_d}{d\theta} \frac{d\theta}{dg(\theta)}, \quad (7)$$

$$\frac{dr_d}{dg(\theta)} = \frac{-f(\xi \sin \theta + 1)}{g'(\theta)(\xi + \sin \theta)^2}.$$

To prove that the extremities of the derivative of the projection function occur at  $\xi = 0$  and  $\xi = 1$ , we need to prove that the derivative is monotonic, i.e.  $\frac{d}{d\xi}(\frac{dr_d}{dg(\theta)}) > 0$ . First we analysis this derivative, using the quotient rule, the derivative becomes:

$$\begin{aligned} \frac{d}{d\xi} \left( \frac{-f(\xi \sin \theta + 1)}{g'(\theta)(\xi + \sin \theta)^2} \right) = \\ \frac{-f \sin \theta (\xi + \sin \theta)^2 + 2f(\xi \sin \theta + 1)(\xi + \sin \theta)}{g'(\theta)(\xi + \sin \theta)^4}. \end{aligned}$$

The denominator is  $g'(\theta)(\xi + \sin \theta)^4$ , since  $g(\theta)$  is monotonic  $g'(\theta) > 0$  and  $(\xi + \sin \theta)^4 > 0$ .

The numerator is:

$$\begin{aligned} N(\xi) = -f \sin \theta (\xi + \sin \theta)^2 \\ + 2f(\xi \sin \theta + 1)(\xi + \sin \theta). \end{aligned} \quad (8)$$

Let us analyze this numerator, we want  $N(\xi) > 0$  as well,

$$\begin{aligned} 2f(\xi \sin \theta + 1)(\xi + \sin \theta) &> f \sin \theta (\xi + \sin \theta)^2, \quad (9) \\ 2(\xi \sin \theta + 1) &> \sin \theta (\xi + \sin \theta) \text{ since } ((\xi + \sin \theta) \neq 0), \\ \xi \sin \theta - \sin^2 \theta + 2 &> 0, \\ 2 &> \sin \theta (\sin \theta - \xi). \end{aligned}$$

Since  $\theta = \text{FOV}/2$  it follows that  $\theta \in [0, \pi]$ ,  $\sin \theta \in [0, 1]$  and  $\xi \in [0, 1]$ . Therefore, the maximum value of  $\sin \theta (\sin \theta - \xi)$  occurs at  $\xi = 0$  and  $\sin \theta = 1$ .

Therefore,  $\frac{d}{d\xi}(\frac{dr_d}{dg(\theta)}) > 0$ , meaning the derivative  $\frac{dr_d}{dg(\theta)}$  is monotonic with respect to  $\xi$ . Consequently, the maximum value of this derivative  $\frac{dr_d}{dg(\theta)}$  occurs either at  $\xi = 0$  or  $\xi = 1$ .

## References

[1] João P. Barreto. A unifying geometric representation for central projection systems. 2006. 2

[2] Hu Cao, Yueyue Wang, Joy Chen, Dongsheng Jiang, Xiaopeng Zhang, Qi Tian, and Manning Wang. Swin-unet: Unet-like pure transformer for medical image segmentation. 2022. 1, 2

[3] Ze Liu, Yutong Lin, Yue Cao, Han Hu, Yixuan Wei, Zheng Zhang, Stephen Lin, and Baining Guo. Swin transformer: Hierarchical vision transformer using shifted windows. 2021. 1, 2

[4] Christopher Mei and Patrick Rives. Single view point omnidirectional camera calibration from planar grids. 2007. 2

[5] Zhuofan Xia, Xuran Pan, Shiji Song, Li Erran Li, and Gao Huang. Vision transformer with deformable attention. 2022. 1, 2

[6] Tete Xiao, Yingcheng Liu, Bolei Zhou, Yuning Jiang, and Jian Sun. Unified perceptual parsing for scene understanding. 2018. 1, 2

[7] Xianghua Ying and Zhanyi Hu. Can we consider central catadioptric cameras and fisheye cameras within a unified imaging model. 2004. 2
